# Supplementary material for: Mail-order microfluidics: evaluation of stereolithography for the production of microfluidic devices
Source: Royal Society of Chemistry journal article supplement (doi:10.1039/c3lc51360b), 2014-01-01
Supplement: c3lc51360b.pdf [file c3lc51360b.pdf]

Supplementary Info:

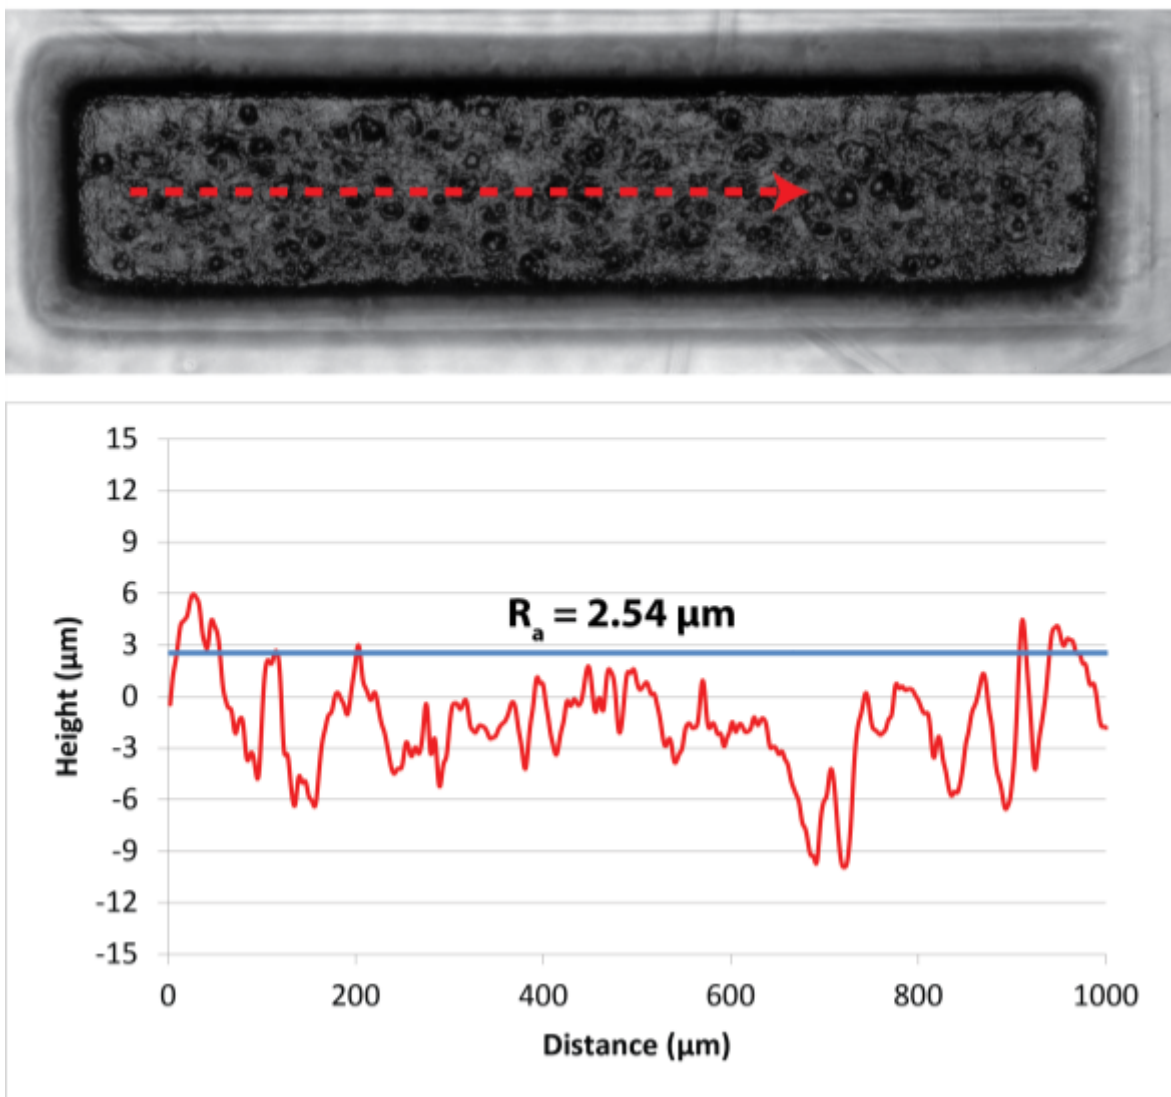

**Fig. S1.** (a) A representative micrograph of a bottom-facing trench and the orientation of line-scans measured using a stylus profilometer. (b) A representative line-scan of median roughness ( $R_a = 2.54 \mu\text{m}$ ).
